# Supplementary material
Source: PubMed Central journal article supplement (PMC1769434)
Supplement: pbio.0050009.sg004.pdf [file pbio.0050009.sg004.pdf]

# Analytical Solutions to Eqs.1 & 2

$$\begin{aligned}
 & \{ \{ \text{Tat}_D(t) \rightarrow \\
 & \left( e^{-\frac{1}{2}t} \left( \delta - k_{p300} + k_{SIRT1} + \sqrt{k_{p300}^2 + (-2\delta + 6k_{SIRT1} + 4k_{TR})k_{p300} + (\delta - k_{SIRT1})^2} \right) \left( -e^t \sqrt{k_{p300}^2 + (-2\delta + 6k_{SIRT1} + 4k_{TR})k_{p300} + (\delta - k_{SIRT1})^2} \right. \right. \\
 & \quad \delta c_1 + \delta c_1 + \left( -1 + e^t \sqrt{k_{p300}^2 + (-2\delta + 6k_{SIRT1} + 4k_{TR})k_{p300} + (\delta - k_{SIRT1})^2} \right) k_{p300} c_1 + \\
 & \quad e^t \sqrt{k_{p300}^2 + (-2\delta + 6k_{SIRT1} + 4k_{TR})k_{p300} + (\delta - k_{SIRT1})^2} \sqrt{(k_{p300}^2 + (-2\delta + 6k_{SIRT1} + 4k_{TR})k_{p300} + (\delta - k_{SIRT1})^2)} c_1 + \\
 & \quad (\delta - k_{SIRT1})^2) c_1 + \sqrt{(k_{p300}^2 + (-2\delta + 6k_{SIRT1} + 4k_{TR})k_{p300} + (\delta - k_{SIRT1})^2)} c_1 + \\
 & \quad \left. \left( -1 + e^t \sqrt{k_{p300}^2 + (-2\delta + 6k_{SIRT1} + 4k_{TR})k_{p300} + (\delta - k_{SIRT1})^2} \right) (c_1 + 2c_2) k_{SIRT1} + \right. \\
 & \quad \left. 2e^t \sqrt{k_{p300}^2 + (-2\delta + 6k_{SIRT1} + 4k_{TR})k_{p300} + (\delta - k_{SIRT1})^2} c_2 k_{TR} - 2c_2 k_{TR} \right) \Big) / \\
 & (2\sqrt{(k_{p300}^2 + (-2\delta + 6k_{SIRT1} + 4k_{TR})k_{p300} + (\delta - k_{SIRT1})^2)}), \\
 & \text{Tat}_A(t) \rightarrow \left( e^{-\frac{1}{2}t} \left( \delta - k_{p300} + k_{SIRT1} + \sqrt{k_{p300}^2 + (-2\delta + 6k_{SIRT1} + 4k_{TR})k_{p300} + (\delta - k_{SIRT1})^2} \right) \right. \\
 & \quad \left( \left( -1 + e^t \sqrt{k_{p300}^2 + (-2\delta + 6k_{SIRT1} + 4k_{TR})k_{p300} + (\delta - k_{SIRT1})^2} \right) (2c_1 - c_2) k_{p300} + \right. \\
 & \quad c_2 \left( \sqrt{(k_{p300}^2 + (-2\delta + 6k_{SIRT1} + 4k_{TR})k_{p300} + (\delta - k_{SIRT1})^2)} \right. \\
 & \quad \left. \left( 1 + e^t \sqrt{k_{p300}^2 + (-2\delta + 6k_{SIRT1} + 4k_{TR})k_{p300} + (\delta - k_{SIRT1})^2} \right) + \right. \\
 & \quad \left. \left( -1 + e^t \sqrt{k_{p300}^2 + (-2\delta + 6k_{SIRT1} + 4k_{TR})k_{p300} + (\delta - k_{SIRT1})^2} \right) \delta - \right. \\
 & \quad \left. \left. \left( -1 + e^t \sqrt{k_{p300}^2 + (-2\delta + 6k_{SIRT1} + 4k_{TR})k_{p300} + (\delta - k_{SIRT1})^2} \right) k_{SIRT1} \right) \right) \Big) / \\
 & \left. (2\sqrt{(k_{p300}^2 + (-2\delta + 6k_{SIRT1} + 4k_{TR})k_{p300} + (\delta - k_{SIRT1})^2)}) \right\} \}
 \end{aligned}$$

When an equation for GFP :

$$\frac{d}{dt} GFP = IRES \times k_{TR} \times Tat_A - \gamma GFP$$

is included in the system of equations the solutions for

$Tat_D(t)$  and  $Tat_A(t)$  do not change and the solution for  $GFP(t)$  is :

$$\begin{aligned} GFP(t) \rightarrow & \left( e^{-\frac{1}{2} t \left( \delta - k_{p300} + k_{SIRT1} + \sqrt{k_{p300}^2 + (-2\delta + 6k_{SIRT1} + 4k_{TR}) k_{p300} + (\delta - k_{SIRT1})^2} \right)} \right. \\ & \left( \left( 2 e^{\frac{1}{2} t \left( -2\gamma + \delta - k_{p300} + k_{SIRT1} + \sqrt{k_{p300}^2 + (-2\delta + 6k_{SIRT1} + 4k_{TR}) k_{p300} + (\delta - k_{SIRT1})^2} \right)} \gamma c_3 - \right. \right. \\ & 4 e^{\frac{1}{2} t \left( -2\gamma + \delta - k_{p300} + k_{SIRT1} + \sqrt{k_{p300}^2 + (-2\delta + 6k_{SIRT1} + 4k_{TR}) k_{p300} + (\delta - k_{SIRT1})^2} \right)} k_{SIRT1} c_3 + \\ & \left. \left( - \left( 1 + e^{t \sqrt{k_{p300}^2 + (-2\delta + 6k_{SIRT1} + 4k_{TR}) k_{p300} + (\delta - k_{SIRT1})^2}} - \right. \right. \right. \\ & \left. \left. \left. 2 e^{\frac{1}{2} t \left( -2\gamma + \delta - k_{p300} + k_{SIRT1} + \sqrt{k_{p300}^2 + (-2\delta + 6k_{SIRT1} + 4k_{TR}) k_{p300} + (\delta - k_{SIRT1})^2} \right)} \right) \right) IRES \right. \\ & (c_1 - c_2) - 2 e^{\frac{1}{2} t \left( -2\gamma + \delta - k_{p300} + k_{SIRT1} + \sqrt{k_{p300}^2 + (-2\delta + 6k_{SIRT1} + 4k_{TR}) k_{p300} + (\delta - k_{SIRT1})^2} \right)} \\ & \left. c_3 \right) k_{TR} \Big) k_{p300}^3 + \\ & \left( -24 e^{\frac{1}{2} t \left( -2\gamma + \delta - k_{p300} + k_{SIRT1} + \sqrt{k_{p300}^2 + (-2\delta + 6k_{SIRT1} + 4k_{TR}) k_{p300} + (\delta - k_{SIRT1})^2} \right)} c_3 k_{SIRT1}^2 + \right. \\ & 2 \left( 5 e^{\frac{1}{2} t \left( -2\gamma + \delta - k_{p300} + k_{SIRT1} + \sqrt{k_{p300}^2 + (-2\delta + 6k_{SIRT1} + 4k_{TR}) k_{p300} + (\delta - k_{SIRT1})^2} \right)} (\gamma + \delta) c_3 + \right. \\ & \left. \left( -3 \left( 1 + e^{t \sqrt{k_{p300}^2 + (-2\delta + 6k_{SIRT1} + 4k_{TR}) k_{p300} + (\delta - k_{SIRT1})^2}} - \right. \right. \right. \\ & \left. \left. \left. 2 e^{\frac{1}{2} t \left( -2\gamma + \delta - k_{p300} + k_{SIRT1} + \sqrt{k_{p300}^2 + (-2\delta + 6k_{SIRT1} + 4k_{TR}) k_{p300} + (\delta - k_{SIRT1})^2} \right)} \right) \right) \right) \\ & IRES (c_1 - c_2) - 14 \\ & e^{\frac{1}{2} t \left( -2\gamma + \delta - k_{p300} + k_{SIRT1} + \sqrt{k_{p300}^2 + (-2\delta + 6k_{SIRT1} + 4k_{TR}) k_{p300} + (\delta - k_{SIRT1})^2} \right)} c_3 \Big) k_{TR} \Big) \\ & k_{SIRT1} - 4 \left( \left( 1 + e^{t \sqrt{k_{p300}^2 + (-2\delta + 6k_{SIRT1} + 4k_{TR}) k_{p300} + (\delta - k_{SIRT1})^2}} - 2 \right. \right. \\ & \left. \left. e^{\frac{1}{2} t \left( -2\gamma + \delta - k_{p300} + k_{SIRT1} + \sqrt{k_{p300}^2 + (-2\delta + 6k_{SIRT1} + 4k_{TR}) k_{p300} + (\delta - k_{SIRT1})^2} \right)} \right) \right) IRES \\ & (c_1 - c_2) + 2 e^{\frac{1}{2} t \left( -2\gamma + \delta - k_{p300} + k_{SIRT1} + \sqrt{k_{p300}^2 + (-2\delta + 6k_{SIRT1} + 4k_{TR}) k_{p300} + (\delta - k_{SIRT1})^2} \right)} c_3 \Big) \\ & k_{TR}^2 + 2 e^{\frac{1}{2} t \left( -2\gamma + \delta - k_{p300} + k_{SIRT1} + \sqrt{k_{p300}^2 + (-2\delta + 6k_{SIRT1} + 4k_{TR}) k_{p300} + (\delta - k_{SIRT1})^2} \right)} \gamma (\gamma - 3\delta) c_3 + \\ & k_{TR} \left( 4 e^{\frac{1}{2} t \left( -2\gamma + \delta - k_{p300} + k_{SIRT1} + \sqrt{k_{p300}^2 + (-2\delta + 6k_{SIRT1} + 4k_{TR}) k_{p300} + (\delta - k_{SIRT1})^2} \right)} (2\gamma + \delta) c_3 + \right. \end{aligned}$$

$$\begin{aligned}
& \text{IRES} \left( \left( 1 + e^t \sqrt{k_{p300}^2 + (-2\delta + 6k_{\text{SIRT1}} + 4k_{\text{TR}})k_{p300} + (\delta - k_{\text{SIRT1}})^2} - \right. \right. \\
& \quad \left. \left. 2e^{\frac{1}{2}t} \left( -2\gamma + \delta - k_{p300} + k_{\text{SIRT1}} + \sqrt{k_{p300}^2 + (-2\delta + 6k_{\text{SIRT1}} + 4k_{\text{TR}})k_{p300} + (\delta - k_{\text{SIRT1}})^2} \right) \right) \delta \right. \\
& \quad (2c_1 - 3c_2) + \left( 1 + e^t \sqrt{k_{p300}^2 + (-2\delta + 6k_{\text{SIRT1}} + 4k_{\text{TR}})k_{p300} + (\delta - k_{\text{SIRT1}})^2} - \right. \\
& \quad \left. 2e^{\frac{1}{2}t} \left( -2\gamma + \delta - k_{p300} + k_{\text{SIRT1}} + \sqrt{k_{p300}^2 + (-2\delta + 6k_{\text{SIRT1}} + 4k_{\text{TR}})k_{p300} + (\delta - k_{\text{SIRT1}})^2} \right) \right) \gamma \\
& \quad c_2 + \left( -1 + e^t \sqrt{k_{p300}^2 + (-2\delta + 6k_{\text{SIRT1}} + 4k_{\text{TR}})k_{p300} + (\delta - k_{\text{SIRT1}})^2} \right) (c_1 - c_2) \\
& \quad \left. \left. \sqrt{(k_{p300}^2 + (-2\delta + 6k_{\text{SIRT1}} + 4k_{\text{TR}})k_{p300} + (\delta - k_{\text{SIRT1}})^2)} \right) \right) k_{p300}^2 - \\
& \quad \left( 4e^{\frac{1}{2}t} \left( -2\gamma + \delta - k_{p300} + k_{\text{SIRT1}} + \sqrt{k_{p300}^2 + (-2\delta + 6k_{\text{SIRT1}} + 4k_{\text{TR}})k_{p300} + (\delta - k_{\text{SIRT1}})^2} \right) c_3 k_{\text{SIRT1}}^3 + \right. \\
& \quad \left( 10e^{\frac{1}{2}t} \left( -2\gamma + \delta - k_{p300} + k_{\text{SIRT1}} + \sqrt{k_{p300}^2 + (-2\delta + 6k_{\text{SIRT1}} + 4k_{\text{TR}})k_{p300} + (\delta - k_{\text{SIRT1}})^2} \right) (\gamma - 2\delta) c_3 + \right. \\
& \quad \left( \left( 1 + e^t \sqrt{k_{p300}^2 + (-2\delta + 6k_{\text{SIRT1}} + 4k_{\text{TR}})k_{p300} + (\delta - k_{\text{SIRT1}})^2} - \right. \right. \\
& \quad \left. \left. 2e^{\frac{1}{2}t} \left( -2\gamma + \delta - k_{p300} + k_{\text{SIRT1}} + \sqrt{k_{p300}^2 + (-2\delta + 6k_{\text{SIRT1}} + 4k_{\text{TR}})k_{p300} + (\delta - k_{\text{SIRT1}})^2} \right) \right) \text{IRES} \right. \\
& \quad (c_1 - c_2) + 2e^{\frac{1}{2}t} \left( -2\gamma + \delta - k_{p300} + k_{\text{SIRT1}} + \sqrt{k_{p300}^2 + (-2\delta + 6k_{\text{SIRT1}} + 4k_{\text{TR}})k_{p300} + (\delta - k_{\text{SIRT1}})^2} \right) \\
& \quad \left. c_3 \right) k_{\text{TR}} \left. k_{\text{SIRT1}}^2 + \right. \\
& \quad \left( k_{\text{TR}} \left( 4e^{\frac{1}{2}t} \left( -2\gamma + \delta - k_{p300} + k_{\text{SIRT1}} + \sqrt{k_{p300}^2 + (-2\delta + 6k_{\text{SIRT1}} + 4k_{\text{TR}})k_{p300} + (\delta - k_{\text{SIRT1}})^2} \right) \right. \right. \\
& \quad (2\gamma - 3\delta) c_3 + \text{IRES} \left( -2 \left( 1 + e^t \sqrt{k_{p300}^2 + (-2\delta + 6k_{\text{SIRT1}} + 4k_{\text{TR}})k_{p300} + (\delta - k_{\text{SIRT1}})^2} - \right. \right. \\
& \quad \left. \left. 2e^{\frac{1}{2}t} \left( -2\gamma + \delta - k_{p300} + k_{\text{SIRT1}} + \sqrt{k_{p300}^2 + (-2\delta + 6k_{\text{SIRT1}} + 4k_{\text{TR}})k_{p300} + (\delta - k_{\text{SIRT1}})^2} \right) \right) \right. \\
& \quad \delta (c_1 - 4c_2) - 6 \left( 1 + e^t \sqrt{k_{p300}^2 + (-2\delta + 6k_{\text{SIRT1}} + 4k_{\text{TR}})k_{p300} + (\delta - k_{\text{SIRT1}})^2} - \right. \\
& \quad \left. 2e^{\frac{1}{2}t} \left( -2\gamma + \delta - k_{p300} + k_{\text{SIRT1}} + \sqrt{k_{p300}^2 + (-2\delta + 6k_{\text{SIRT1}} + 4k_{\text{TR}})k_{p300} + (\delta - k_{\text{SIRT1}})^2} \right) \right) \\
& \quad \gamma c_2 + \left( -1 + e^t \sqrt{k_{p300}^2 + (-2\delta + 6k_{\text{SIRT1}} + 4k_{\text{TR}})k_{p300} + (\delta - k_{\text{SIRT1}})^2} \right) (c_1 + 3c_2) \\
& \quad \left. \left. \sqrt{(k_{p300}^2 + (-2\delta + 6k_{\text{SIRT1}} + 4k_{\text{TR}})k_{p300} + (\delta - k_{\text{SIRT1}})^2)} \right) \right) - \\
& \quad 4e^{\frac{1}{2}t} \left( -2\gamma + \delta - k_{p300} + k_{\text{SIRT1}} + \sqrt{k_{p300}^2 + (-2\delta + 6k_{\text{SIRT1}} + 4k_{\text{TR}})k_{p300} + (\delta - k_{\text{SIRT1}})^2} \right) \\
& \quad (3\gamma^2 - 3\delta\gamma - 2\delta^2) c_3 \left. k_{\text{SIRT1}} + \right. \\
& \quad 2e^{\frac{1}{2}t} \left( -2\gamma + \delta - k_{p300} + k_{\text{SIRT1}} + \sqrt{k_{p300}^2 + (-2\delta + 6k_{\text{SIRT1}} + 4k_{\text{TR}})k_{p300} + (\delta - k_{\text{SIRT1}})^2} \right) \gamma (2\gamma - 3\delta) \delta c_3 + \\
& \quad 2 \text{IRES} c_2 k_{\text{TR}}^2 \left( \sqrt{(k_{p300}^2 + (-2\delta + 6k_{\text{SIRT1}} + 4k_{\text{TR}})k_{p300} + (\delta - k_{\text{SIRT1}})^2)} \right. \\
& \quad \left. \left( -1 + e^t \sqrt{k_{p300}^2 + (-2\delta + 6k_{\text{SIRT1}} + 4k_{\text{TR}})k_{p300} + (\delta - k_{\text{SIRT1}})^2} \right) - \right.
\end{aligned}$$

$$\begin{aligned}
& 2 \left( 1 + e^{t \sqrt{k_{p300}^2 + (-2\delta + 6k_{SIRT1} + 4k_{TR})k_{p300} + (\delta - k_{SIRT1})^2}} - 2 \right. \\
& \quad \left. e^{\frac{1}{2}t \left( -2\gamma + \delta - k_{p300} + k_{SIRT1} + \sqrt{k_{p300}^2 + (-2\delta + 6k_{SIRT1} + 4k_{TR})k_{p300} + (\delta - k_{SIRT1})^2} \right)} \right) \gamma + \\
& 2 \left( 1 + e^{t \sqrt{k_{p300}^2 + (-2\delta + 6k_{SIRT1} + 4k_{TR})k_{p300} + (\delta - k_{SIRT1})^2}} - 2 \right. \\
& \quad \left. e^{\frac{1}{2}t \left( -2\gamma + \delta - k_{p300} + k_{SIRT1} + \sqrt{k_{p300}^2 + (-2\delta + 6k_{SIRT1} + 4k_{TR})k_{p300} + (\delta - k_{SIRT1})^2} \right)} \right) \delta + \\
& k_{TR} \left( \text{IRES} \left( \left( 1 + e^{t \sqrt{k_{p300}^2 + (-2\delta + 6k_{SIRT1} + 4k_{TR})k_{p300} + (\delta - k_{SIRT1})^2}} - \right. \right. \right. \\
& \quad \left. \left. 2 e^{\frac{1}{2}t \left( -2\gamma + \delta - k_{p300} + k_{SIRT1} + \sqrt{k_{p300}^2 + (-2\delta + 6k_{SIRT1} + 4k_{TR})k_{p300} + (\delta - k_{SIRT1})^2} \right)} \right) \right) \\
& \quad (c_1 - 3c_2)\delta^2 + \left( \left( -1 + e^{t \sqrt{k_{p300}^2 + (-2\delta + 6k_{SIRT1} + 4k_{TR})k_{p300} + (\delta - k_{SIRT1})^2}} \right) \right. \\
& \quad \left. \sqrt{(k_{p300}^2 + (-2\delta + 6k_{SIRT1} + 4k_{TR})k_{p300} + (\delta - k_{SIRT1})^2)} \right. \\
& \quad (c_1 - 2c_2) + 2 \left( 1 + e^{t \sqrt{k_{p300}^2 + (-2\delta + 6k_{SIRT1} + 4k_{TR})k_{p300} + (\delta - k_{SIRT1})^2}} - \right. \\
& \quad \left. 2 e^{\frac{1}{2}t \left( -2\gamma + \delta - k_{p300} + k_{SIRT1} + \sqrt{k_{p300}^2 + (-2\delta + 6k_{SIRT1} + 4k_{TR})k_{p300} + (\delta - k_{SIRT1})^2} \right)} \right) \\
& \quad \left. \gamma c_2 \right) \delta - \left( -1 + e^{t \sqrt{k_{p300}^2 + (-2\delta + 6k_{SIRT1} + 4k_{TR})k_{p300} + (\delta - k_{SIRT1})^2}} \right) \gamma \\
& \quad (2c_1 - c_2) \sqrt{(k_{p300}^2 + (-2\delta + 6k_{SIRT1} + 4k_{TR})k_{p300} + (\delta - k_{SIRT1})^2)} - \\
& 2 e^{\frac{1}{2}t \left( -2\gamma + \delta - k_{p300} + k_{SIRT1} + \sqrt{k_{p300}^2 + (-2\delta + 6k_{SIRT1} + 4k_{TR})k_{p300} + (\delta - k_{SIRT1})^2} \right)} \\
& \quad (4\gamma^2 - 4\delta\gamma - \delta^2)c_3 \Big) k_{p300} + (\gamma - \delta)(\delta - k_{SIRT1}) \\
& \left( 2 e^{\frac{1}{2}t \left( -2\gamma + \delta - k_{p300} + k_{SIRT1} + \sqrt{k_{p300}^2 + (-2\delta + 6k_{SIRT1} + 4k_{TR})k_{p300} + (\delta - k_{SIRT1})^2} \right)} c_3 k_{SIRT1}^2 - \right. \\
& \quad \left( 2 e^{\frac{1}{2}t \left( -2\gamma + \delta - k_{p300} + k_{SIRT1} + \sqrt{k_{p300}^2 + (-2\delta + 6k_{SIRT1} + 4k_{TR})k_{p300} + (\delta - k_{SIRT1})^2} \right)} (\gamma + \delta)c_3 + \right. \\
& \quad \left( 1 + e^{t \sqrt{k_{p300}^2 + (-2\delta + 6k_{SIRT1} + 4k_{TR})k_{p300} + (\delta - k_{SIRT1})^2}} - 2 \right. \\
& \quad \left. e^{\frac{1}{2}t \left( -2\gamma + \delta - k_{p300} + k_{SIRT1} + \sqrt{k_{p300}^2 + (-2\delta + 6k_{SIRT1} + 4k_{TR})k_{p300} + (\delta - k_{SIRT1})^2} \right)} \right) \text{IRES} c_2 \\
& \quad \left. k_{TR} \right) k_{SIRT1} + 2 e^{\frac{1}{2}t \left( -2\gamma + \delta - k_{p300} + k_{SIRT1} + \sqrt{k_{p300}^2 + (-2\delta + 6k_{SIRT1} + 4k_{TR})k_{p300} + (\delta - k_{SIRT1})^2} \right)} \\
& \gamma \delta c_3 + \text{IRES} c_2 k_{TR} \left( \sqrt{(k_{p300}^2 + (-2\delta + 6k_{SIRT1} + 4k_{TR})k_{p300} + (\delta - k_{SIRT1})^2)} \right. \\
& \quad \left( -1 + e^{t \sqrt{k_{p300}^2 + (-2\delta + 6k_{SIRT1} + 4k_{TR})k_{p300} + (\delta - k_{SIRT1})^2}} \right) + \\
& \quad \left( 1 + e^{t \sqrt{k_{p300}^2 + (-2\delta + 6k_{SIRT1} + 4k_{TR})k_{p300} + (\delta - k_{SIRT1})^2}} - 2 \right. \\
& \quad \left. e^{\frac{1}{2}t \left( -2\gamma + \delta - k_{p300} + k_{SIRT1} + \sqrt{k_{p300}^2 + (-2\delta + 6k_{SIRT1} + 4k_{TR})k_{p300} + (\delta - k_{SIRT1})^2} \right)} \right) \delta \Big) \Big) \Big) \Big) \Big) / \\
& (2((\gamma - \delta)(\gamma - k_{SIRT1}) + k_{p300}(\gamma - 2k_{SIRT1} - k_{TR}))
\end{aligned}$$

$$(k_{p300}^2 + (-2\delta + 6k_{SIRT1} + 4k_{TR})k_{p300} + (\delta - k_{SIRT1})^2))$$

**For simplicity we can substitute numerical values into the above solutions to obtain the following:**

**Simplify[gfpsolns /. {k<sub>p300</sub> → .01, k<sub>SIRT1</sub> → 1, k<sub>TR</sub> → .1, δ → 2, γ → 0.5, IRES → 10}]**

$$\begin{aligned} \{ \{ \text{Tat}_D(t) &\rightarrow e^{-2.00099 t} ((0.989141 + 0.0108591 e^{1.01198 t}) c_1 + (-1.08698 + 1.08698 e^{1.01198 t}) c_2), \\ \text{Tat}_A(t) &\rightarrow e^{-2.00099 t} ((-0.00988164 + 0.00988164 e^{1.01198 t}) c_1 + (0.0108591 + 0.989141 e^{1.01198 t}) c_2), \\ \text{GFP}(t) &\rightarrow e^{-2.00099 t} ((0.00658342 - 0.0202074 e^{1.01198 t} + 0.013624 e^{1.50099 t}) c_1 + \\ &(-0.0072346 - 2.02274 e^{1.01198 t} + 2.02997 e^{1.50099 t}) c_2 + 1. e^{1.50099 t} c_3) \} \} \end{aligned}$$
