# Supplementary material
Source: PubMed Central journal article supplement (PMC1769434)

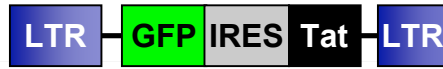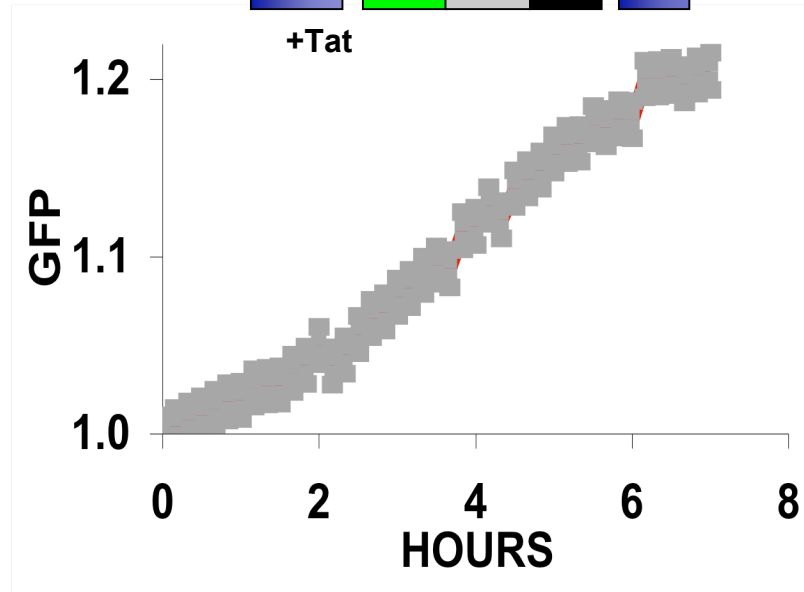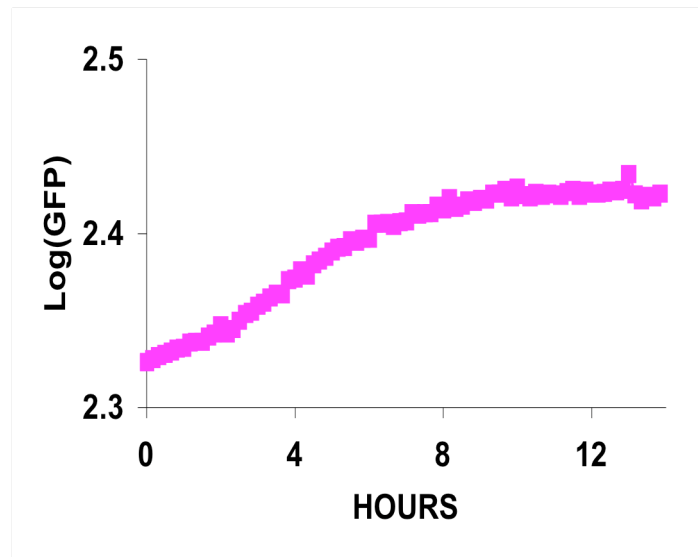

Supplement: pbio.0050009.sg002.pdf [file pbio.0050009.sg002.pdf]

**Decay to Tat Off-state for:  
eGFP ( $t_{1/2}$ =48hrs) vs. TatGFP ( $t_{1/2}$ =~12hrs)**

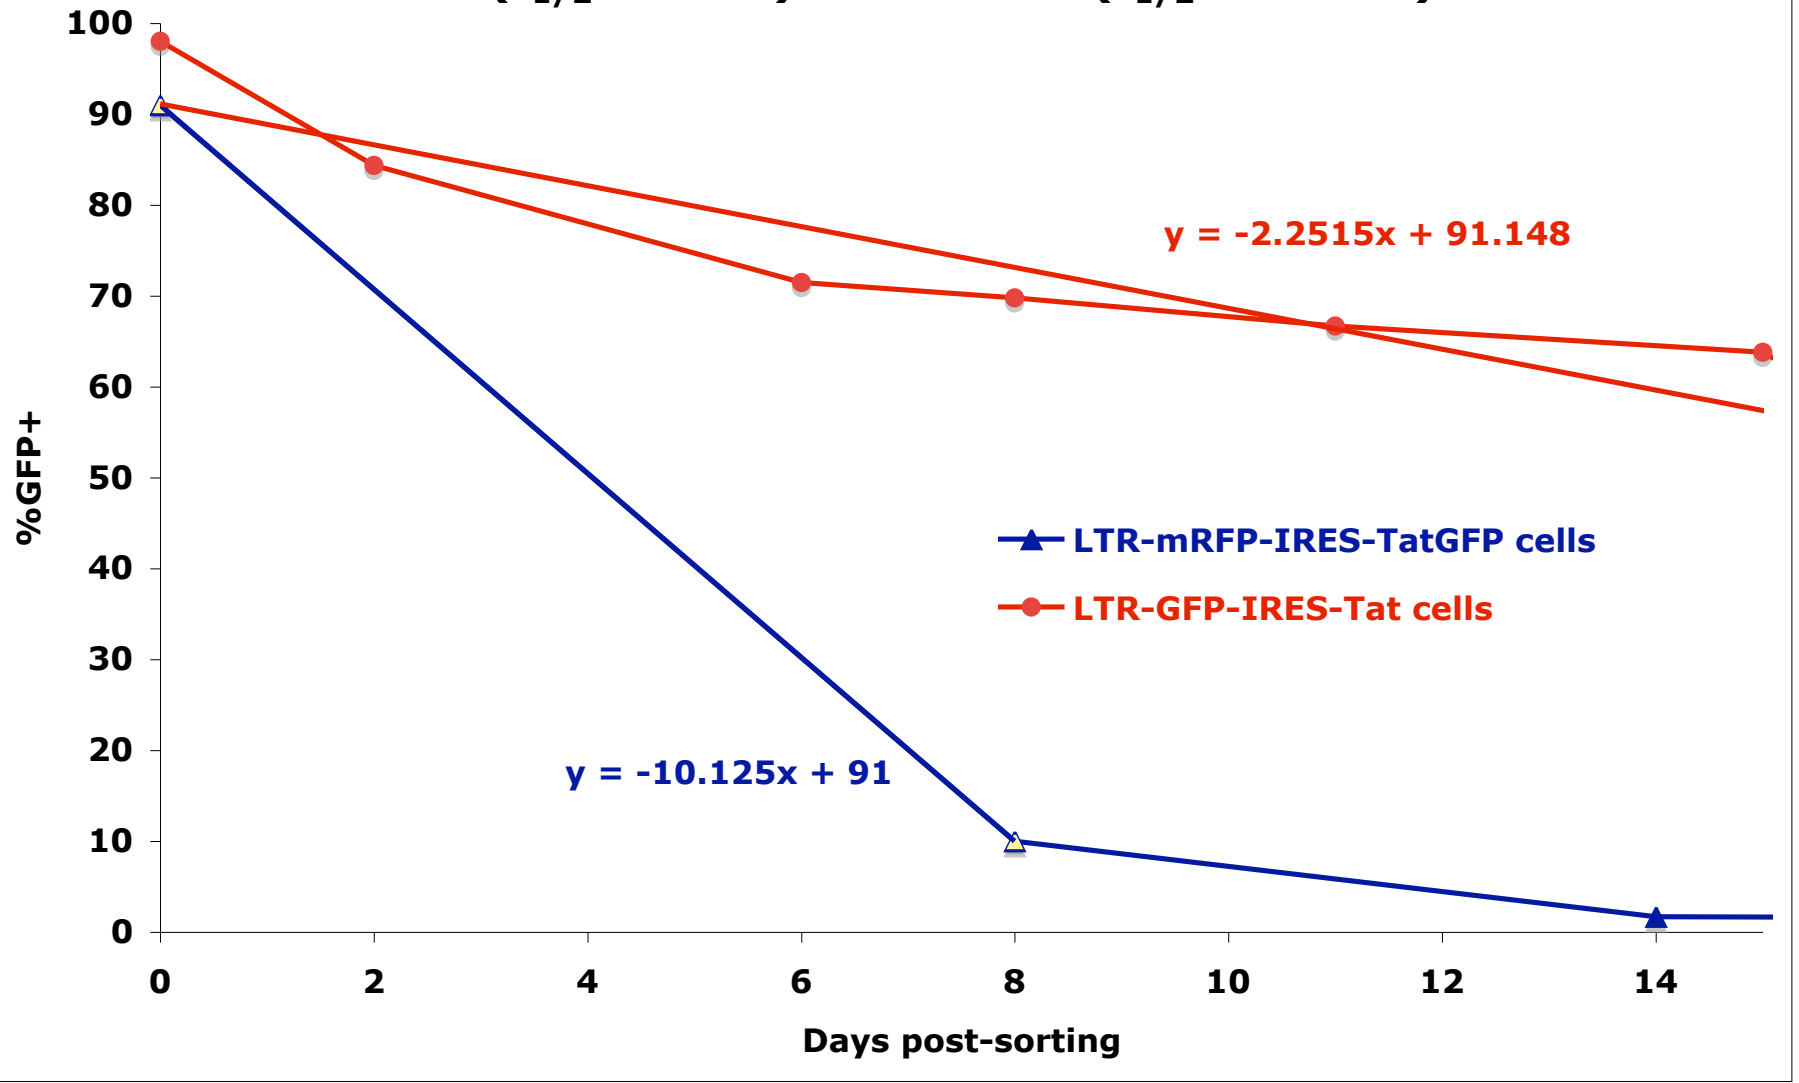

Supplement: pbio.0050009.sg005.pdf [file pbio.0050009.sg005.pdf]
